# Supplementary material for: Pro-metastatic collagen lysyl hydroxylase dimer assemblies stabilized by Fe2+-binding
Source: PubMed Central journal article supplement (PMC5802723; doi:10.1038/s41467-018-02859-z), 2018-02-06
Supplement: 41467_2018_2859_MOESM1_ESM.pdf [file 41467_2018_2859_MOESM1_ESM.pdf]

Supplementary File:

Guo et al. "Pro-metastatic collagen lysyl hydroxylase dimer assemblies stabilized by Fe<sup>2+</sup>-binding" (NCOMMS-17-24325A)

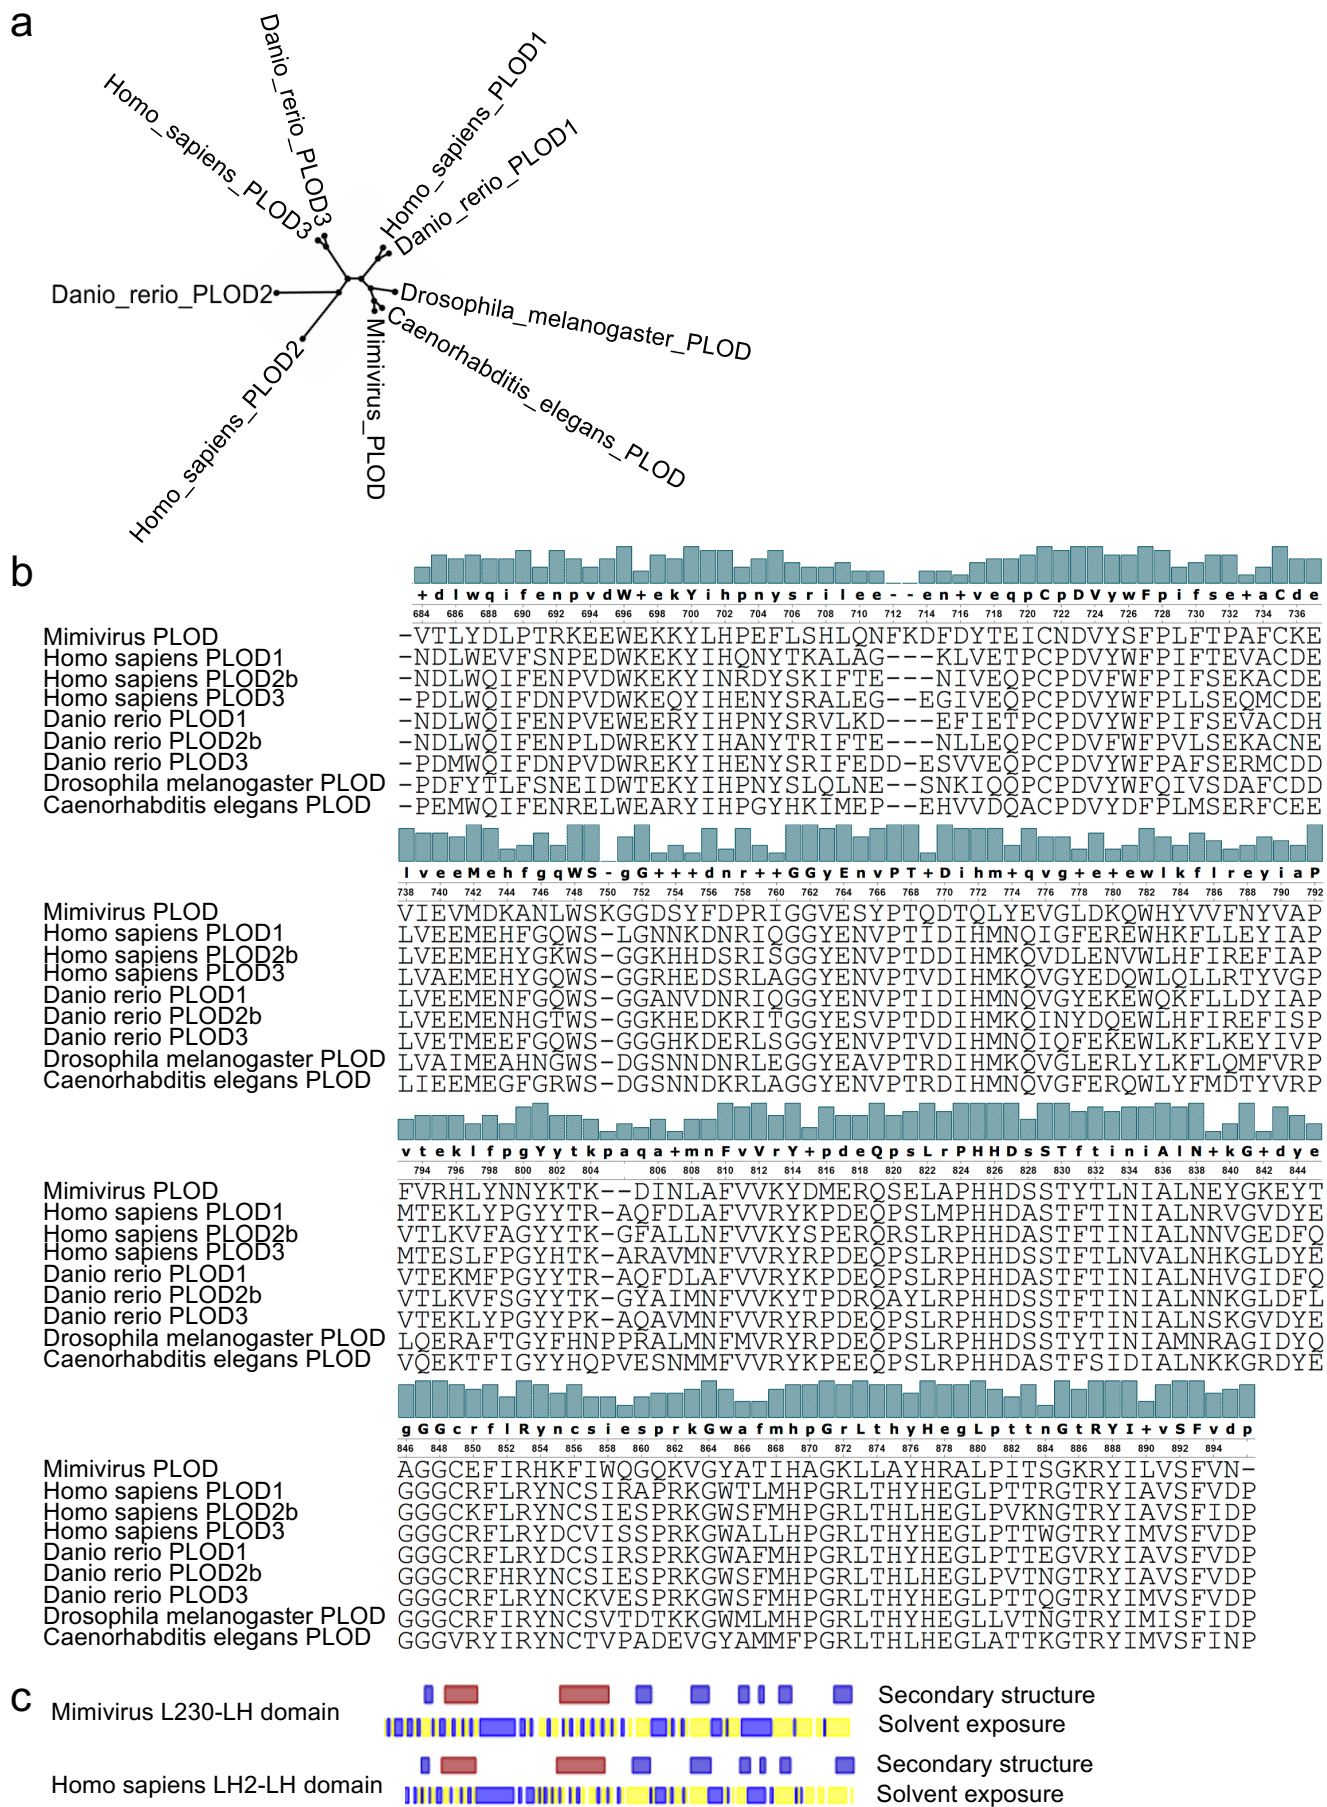

**Supplementary Figure 1 | Sequence alignment of L230 with invertebrate and vertebrate LHs. a and b,** A cladogram of LHs (a) was generated based on the amino acid sequence alignment (b) of collagen LHs from Homo sapiens, Danio rerio, Drosophila melanogaster, Caenorhabditis elegans and Mimivirus using a CLUSTALW server (<http://www.genome.jp/tools-bin/clustalw>). Amino acids are color-coded. The gene name, protein name and UniprotKB accession number of these LHs are shown in Supplementary Table 1. **c,** Predicted secondary structures ( $\alpha$  helices, red;  $\beta$  sheets, blue) and solvent-exposed regions (exposed, blue; non-exposed, yellow) in L230 and human LHs using a prediction algorithm ([www.predictprotein.org](http://www.predictprotein.org)).

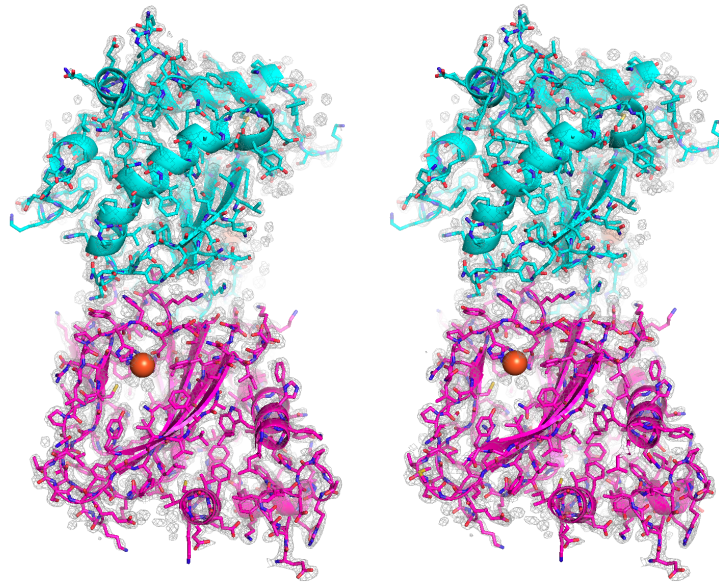

Supplementary Figure 2 | Stereo view of electron density map ( $2F_o - F_c$ ) of L230 LH domain. The contour level for map is 1.0 $\sigma$ .

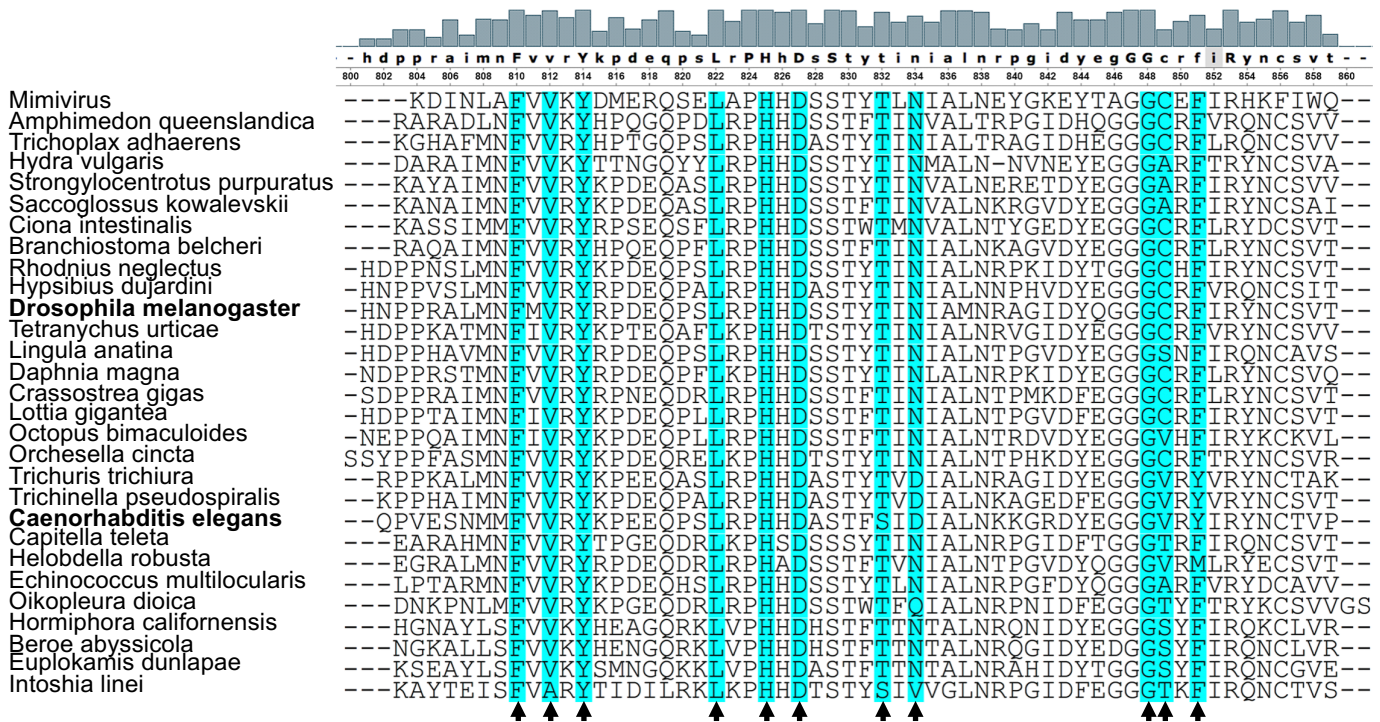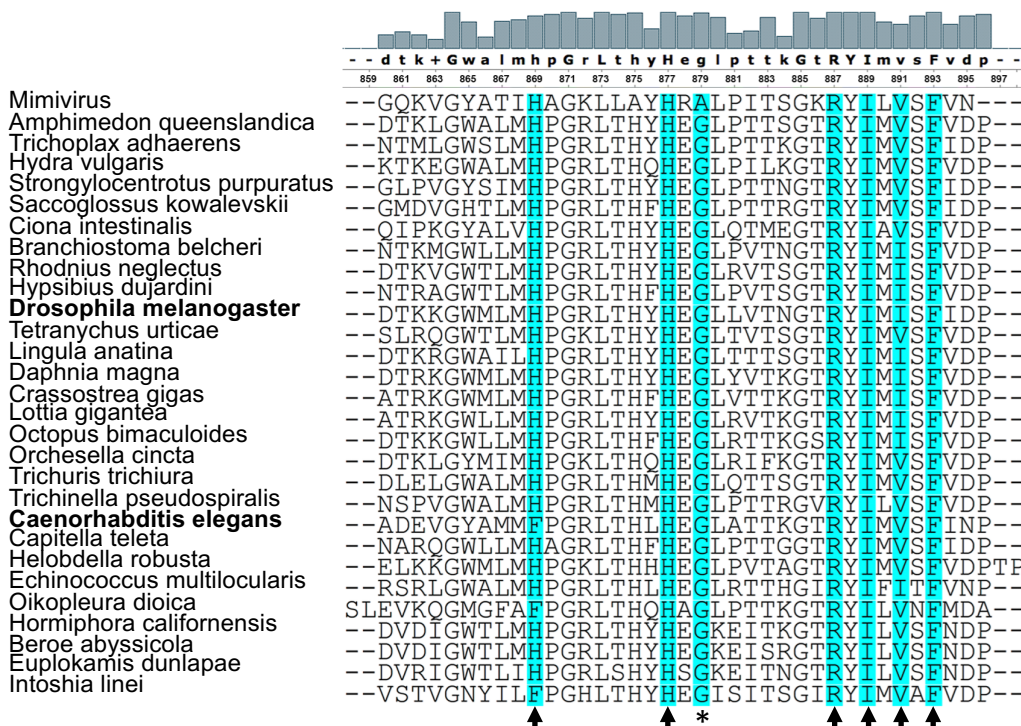

**Supplementary Figure 3 | Sequence alignment of L230 with invertebrate LHs.** Residues with side chains facing the 2-OG binding pocket (cyan) that are conserved are indicated (arrows). Non-conserved A869 is indicated (asterisk). Species and NCBI GenPept accession number of invertebrate LHs are listed in Supplementary Table 2.

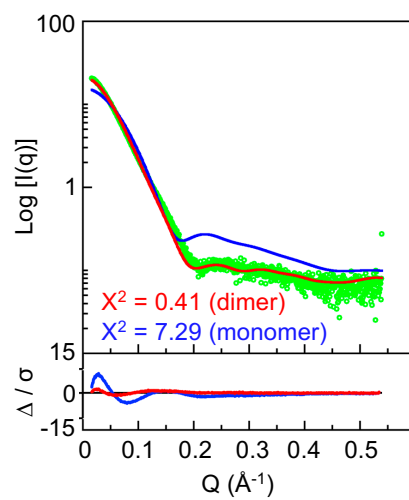

**Supplementary Figure 4 | L230 forms a dimer in solution.** Small angle X ray scattering (SAXS) analysis. Top, Curves modeling monomeric (blue) and dimeric (red) L230 LH domain were fit to experimental SAXS data (green). Bottom, Residual difference plots ( $\Delta/\sigma = \frac{I_{exp}(q) - I_{mod}(q)}{\sigma(q)}$ ) show  $I(q)$  is significantly flat on dimer (red) compared to monomer (blue) fit.

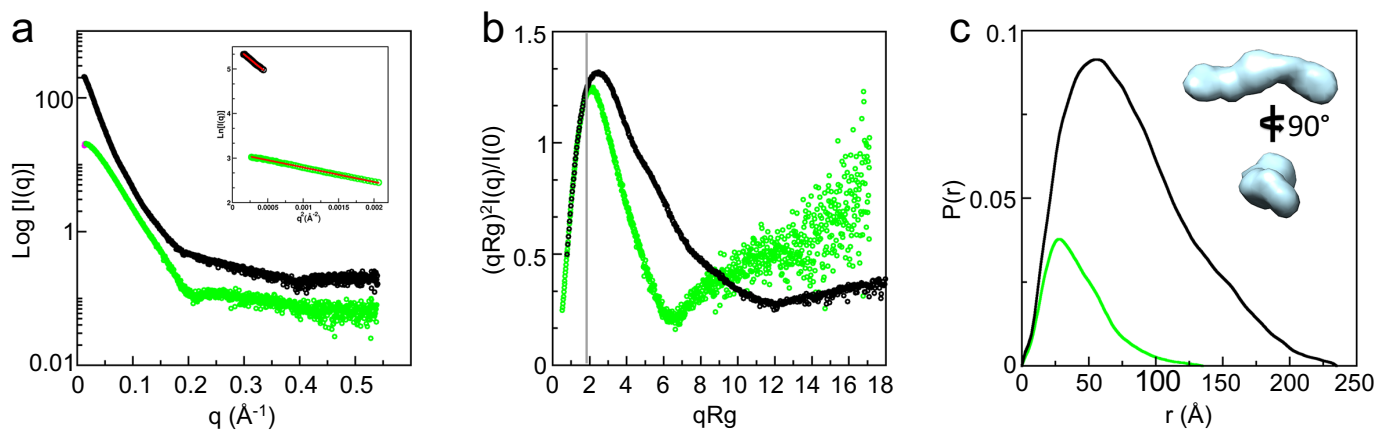

**Supplementary Figure 5 | Comparison of L230 and human LH2 structural features.** (a) SAXS analysis of full-length LH2 (black) and L230 LH domain (green) with the inset Guinier plot shows the Guinier fits for  $qR_g < 1.3$ . (b) Dimensionless Kratky plot shows that full-length LH2 (black) is relatively more flexible than L230 LH domain (green). The most globular compact protein should have peak at  $qR_g = \sqrt{3} = 1.732$  (vertical gray line). The peak shifts to the right of  $qR_g > 1.732$  meaning that it is more flexible or elongated. (c) Pair-distribution function shows that full-length LH2 (black) and L230 LH domain (green) both have an elongated shape (SAXS envelope of LH2 shown in cyan), supporting a tail-to-tail dimerization.

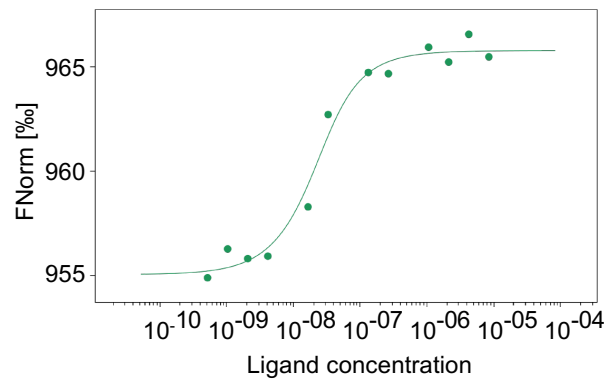

**Supplementary Figure 6 | Dimer affinity of the L230 LH domain.** Microscale thermophoresis was used to determine the  $K_d$  value for L230 dimer ( $23.9 \pm 2.4$  nM).

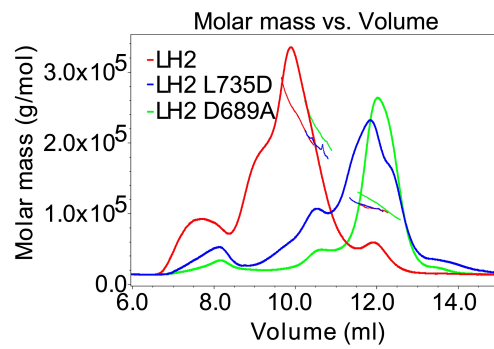

**Supplementary Figure 7 | Human LH2 dimer assemblies require the conserved leucine and Fe<sup>2+</sup>.** SEC-MALS was performed on full-length human LH2 that is wild-type (LH2) or lacks the conserved leucine (L735D) or is deficient in Fe<sup>2+</sup> binding (D689A). On the basis of elution volume (X axis) and molar mass (Y axis), the L735D and D689A mutants are monomeric proteins.



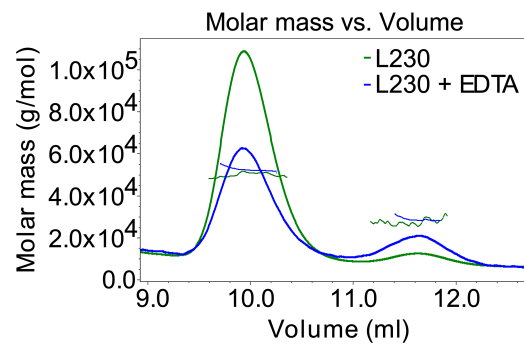

**Supplementary Figure 8 | Dimerization is lost following Fe<sup>2+</sup> chelation.** SEC-MALS was performed on L230 LH domain treated with (L230 + EDTA) or without (L230) 25 mM EDTA. On the basis of elution volume (X axis) and molar mass (Y axis), a portion of EDTA-treated protein is monomeric.

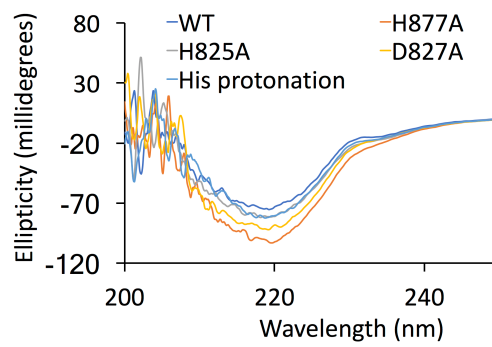

**Supplementary Figure 9 | No alteration in L230 secondary structure due to loss of Fe<sup>2+</sup>-binding.** Circular dichroism spectrometry of wild-type L230 (WT) and L230 that is Fe<sup>2+</sup>-deficient due to histidine protonation or mutations in the amino acid triad. The proteins demonstrated similar spectra.

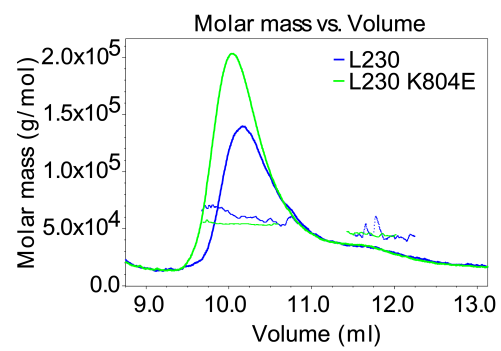

**Supplementary Figure 10 | A cleft mutation does not disrupt dimerization.** SEC-MALS was performed on L230 LH domain that is wild-type (L230) or mutant (L230 K804E). On the basis of elution volume (X axis) and molar mass (Y axis), K804E is a dimeric protein.

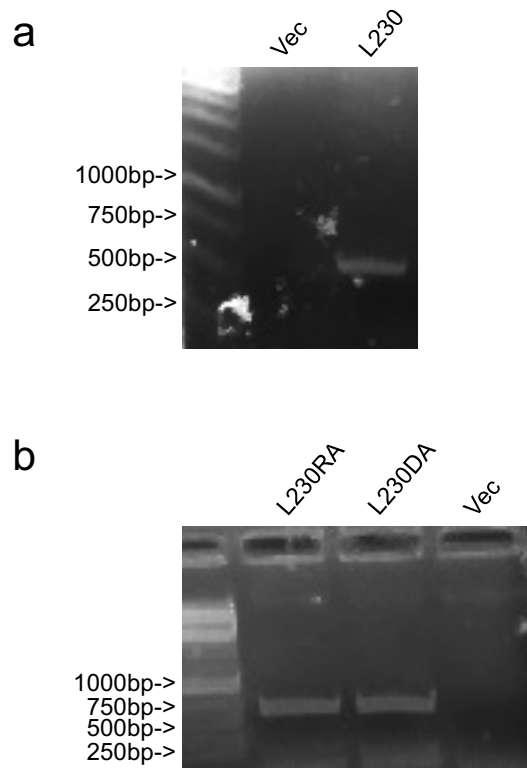

**Supplementary Figure 11** | (a, b) The ectopic expression of wild-type L230 (a) and mutant L230 (b) in H1299 cells transfected with L230 or empty vector (Vec) was confirmed by PCR. The mutants include L230 D827A (DA) and L230 R887A (RA).

**Supplementary Table 1** UniProtKB accession number of LH sequences used in **Extended Data Figure 1b**

| <b>Gene name</b> | <b>Species</b>                   | <b>Protein name</b>                                   | <b>UniProtKB accession number</b> |
|------------------|----------------------------------|-------------------------------------------------------|-----------------------------------|
| MIMI_L230        | Acanthamoeba polyphaga mimivirus | Procollagen lysyl hydroxylase and glycosyltransferase | Q5UQC3                            |
| PLOD1            | Homo sapiens                     | Procollagen-lysine,2-oxoglutarate 5-dioxygenase 1     | Q02809                            |
| PLOD2            | Homo sapiens                     | Procollagen-lysine,2-oxoglutarate 5-dioxygenase 2     | O00469-2                          |
| PLOD3            | Homo sapiens                     | Procollagen-lysine,2-oxoglutarate 5-dioxygenase 3     | O60568                            |
| PLOD1            | Danio rerio                      | Procollagen-lysine,2-oxoglutarate 5-dioxygenase 1     | A0JMD1                            |
| PLOD2            | Danio rerio                      | Procollagen-lysine,2-oxoglutarate 5-dioxygenase 2     | A4U7F9                            |
| PLOD3            | Danio rerio                      | Procollagen-lysine,2-oxoglutarate 5-dioxygenase 3     | Q1L618                            |
| PLOD             | Drosophila melanogaster          | Procollagen lysyl hydroxylase, isoform A              | Q9VTH0                            |
| Let-268          | Caenorhabditis elegans           | Procollagen-lysine,2-oxoglutarate 5-dioxygenase       | Q20679                            |

**Supplementary Table 2** Invertebrate LH NCBI GenPept accession numbers

| <b>Species</b>                 | <b>NCBI GenPept accession number</b> |
|--------------------------------|--------------------------------------|
| Amphimedon queenslandica       | XP_019854114.1                       |
| Trichoplax adhaerens           | XP_002113369.1                       |
| Hydra vulgaris                 | XP_002157097.1                       |
| Strongylocentrotus purpuratus  | XP_011661533.1                       |
| Saccoglossus kowalevskii       | XP_006811878.1                       |
| Ciona intestinalis             | XP_002131164.1                       |
| Branchiostoma belcheri         | XP_019623603.1                       |
| Rhodnius neglectus             | JA155597.1                           |
| Hypsibius dujardini            | OQV13852.1                           |
| <b>Drosophila melanogaster</b> | NP_648451.1                          |
| Tetranychus urticae            | XP_015786267.1                       |
| Lingula anatina                | XP_013392392.1                       |
| Daphnia magna                  | JAN34138.1                           |
| Crassostrea gigas              | XP_011437798.1                       |
| Lottia gigantea                | XP_009053597.1                       |
| Octopus bimaculoides           | XP_014782723.1                       |
| Orchesella cincta              | ODM93852.1                           |
| Trichuris trichiura            | CDW52628.1                           |
| Trichinella pseudospiralis     | KRY65651.1                           |
| <b>Caenorhabditis elegans</b>  | NP_496170.1                          |
| Capitella teleta               | ELT92140.1                           |
| Helobdella robusta             | XP_009020625.1                       |
| Echinococcus multilocularis    | CDS37198.1                           |
| Oikopleura dioica              | CBY36038.1                           |
| Hormiphora californensis       | AQX17749.1                           |
| Beroe abyssicola               | AQX17751.1                           |
| Euplokamis dunlapae            | AQX17750.1                           |
| Intoshia linei                 | OAF69316.1                           |

**Supplementary Table 3** Summary of data analysis of the experimental SAXS profiles

| <b>Data Collection</b>                                          | L230                             | LH2                                         |
|-----------------------------------------------------------------|----------------------------------|---------------------------------------------|
| Beamline                                                        | ALS Beamline BL12.3.1            | ALS Beamline BL12.3.1                       |
| Beam energy (keV)                                               | 11                               | 11                                          |
| Sample-detector distance (m)                                    | 1.5                              | 1.5                                         |
| Detector                                                        | Pilatus                          | Pilatus                                     |
| Exposure time (s)                                               | Every 0.3s. Total: 10.2 s.       | Every 0.3s. Total: 10.2 s.                  |
| Images                                                          | Total: 33 images                 | Total: 33 images                            |
| Sample cell thickness (mm)                                      | 1.5                              | 1.5                                         |
| Temperature (K)                                                 | 283                              | 283                                         |
| Final $q$ range ( $\text{\AA}^{-1}$ )                           | 0.01 to 0.5                      | 0.01 to 0.5                                 |
| <b>Data Analysis</b>                                            |                                  |                                             |
| Programs                                                        | SCATTER 3.0                      | SCATTER 3.0                                 |
| Buffer                                                          | 20 mM Tris, pH 8,<br>200 mM NaCl | 20mM Tris, pH 8, 200mM<br>NaCl, 1% Glycerol |
| Protein concentration (mg/ml)                                   | 1.5, 3, 6                        | 1, 3, 5                                     |
| Points used for Guinier analysis                                | 7-52                             | 1-16                                        |
| Guinier $qR_g$ limits                                           | 1.3                              | 1.3                                         |
| $I(0)$ ( $\text{cm}^{-1}$ )                                     | $22.830 \pm 0.038$               | $257.000 \pm 1.466$                         |
| Guinier $R_g$ ( $\text{\AA}$ )                                  | $31.82 \pm 0.26$                 | $62.85 \pm 2.26$                            |
| $D_{\text{max}}$ ( $\text{\AA}$ )                               | 135                              | 235                                         |
| $R_g$ (real) ( $\text{\AA}$ )                                   | $33.78 \pm 0.712$                | $65.28 \pm 0.307$                           |
| $R_g$ (reciprocal) ( $\text{\AA}$ )                             | 33.59                            | 64.93                                       |
| <i>Ab initio</i> Modeling                                       | DAMMIF                           | GASBOR                                      |
| MW estimation (Vc based) (kDa) <sup>1</sup>                     | 41                               | 200                                         |
| Porod Volume ( $\text{\AA}^3$ ) (q-range ( $\text{\AA}^{-1}$ )) | 105863 (0.01 – 0.140)            | 500680 (0.01 – 0.120)                       |
| Porod Exponent                                                  | 3.7                              | 3.6                                         |

<sup>1</sup> MW is estimated based on  $MW = \frac{(V_c)^{2/3} R_g}{0.1231}$ , using SCATTER program.

**Supplementary Table 4** MW of L230 and human LH2 proteins determined by SEC-MALS

| Conditions*                                            | MW <sub>monomer</sub> (kDa) | Mass fraction (%) | MW <sub>dimer</sub> (kDa) | Mass fraction (%) |
|--------------------------------------------------------|-----------------------------|-------------------|---------------------------|-------------------|
| L230                                                   | 28.8 (± 2.0%)               | 10.5              | 52.6 (± 2.5%)             | 89.5              |
| L230 H825A                                             | 35.1 (± 0.9%)               | 94.1              | -                         | -                 |
| L230 D827A                                             | 29.9 (± 2.4%)               | 90.6              | 53.5 (± 7.9%)             | 9.4               |
| L230 A869G                                             | 28.4 (± 1.7%)               | 12.2              | 51.3 (± 2.7%)             | 87.8              |
| L230 L873D                                             | 28.5 (± 2.8%)               | 94.9              | 51.2 (± 2.3%)             | 5.1               |
| L230 H877A                                             | 28.6 (± 1.3%)               | 92.9              | 55.6 (± 1.4%)             | 7.1               |
| L230 R887A                                             | 26.5 (± 2.1%)               | 8.8               | 50.4 (± 3.7%)             | 91.2              |
| L230 + EDTA                                            | 37.0 (± 4.3%)               | 34.5              | 58.8 (± 2.0%)             | 65.5              |
| L230/His protonation                                   | 26.3 (± 1.6%)               | 79.4              | 52.5 (± 2.8%)             | 20.6              |
| L230/His protonation + Fe <sup>2+</sup> reconstitution | 26.7 (± 2.5%)               | 24.5              | 51.5 (± 1.6%)             | 75.5              |
| LH2                                                    | 107.4 (± 1.2%)              | 21.8              | 239.2 (± 0.2%)            | 78.2              |
| LH2 L735D                                              | 111.2 (± 3.5%)              | 84.8              | 196.7 (± 3.2%)            | 15.2              |
| LH2 D689A                                              | 110.3 (± 0.9%)              | 95.0              | 215.9 (± 1.2%)            | 5.0               |

\* L230 includes LH domain only (aa 680-895). LH2 includes aa 33-758.



**Supplementary Table 5** DNA primers used in this study

| Name             | Primer sequence                                                   |
|------------------|-------------------------------------------------------------------|
| L230 forward1    | GTGCTGCCCGGGCCACCATGGGGGATGCACGGTG                                |
| L230 forward2    | GAGACCTCGAGGCAGCGTTCCTACCGAAGTTACTCTTTATGATCTTCC                  |
| L230 reverse     | GCGTCGGCGGCCGCTTAATTAACAAAAGACACTAAAATATATCTTTTACCGAAGTAATTGG     |
| D827A            | GACAATCTGAATTGGCTCCTCATCATGCTTCTTCCACATATACTTTAAATATTGCACTTAATG   |
| L873D forward    | GTAATTGGAAGAGCTCGATGATGCCAAGTCTTTTCCAGCGTGAATTGTAGCGTAACC         |
| L873D reverse    | GGTTACGCTACAATTCACGCTGGAAAAGACTTGGCATATCATCGAGCTCTTCCAATTAC       |
| H877A forward    | CACGCTGGAAAACCTATTGGCATATGCTCGAGCTCTTCCAATTACTTCCGG               |
| H877A reverse    | CCGGAAGTAATTGGAAGAGCTCGAGCATATGCCAATAGTTTTCCAGCGTG                |
| H825A forward    | GCAATATTTAAAGTATATGTGGAAGAATCATGAGCAGGAGCCAATTCAGATTGTCTTCCATATC  |
| H825A reverse    | GATATGGAAAGACAATCTGAATTGGCTCCTGCTCATGATTCTTCCACATATACTTTAAATATTGC |
| R887A forward    | GGCCGCTTAATTAACAAAAGACACTAAAATATATGCTTTACCGAAGTAATTGGAAGAGCTCG    |
| R887A reverse    | CGAGCTTCCAATTACTTCCGGTAAAGCATATATTTAGTGTCTTTGTTAATTAAGCGGCC       |
| K804E forward    | CGTCATTTACAATAATTATAAAACCGAAGATATTAATTTAGCTTTTGTGTTAAATATG        |
| K804E reverse    | CATATTTAACAACAAAAGCTAAATTAATATCTTCGGTTTTATAATTATGTATAAATGACG      |
| A881G forward    | GGAAAACCTATTGGCATATCATCGAGGCTTCCAATTACTTCCGGTAAAAG                |
| A881G reverse    | CTTTTACCGAAGTAATTGGAAGACCTCGATGATATGCCAATAGTTTTCC                 |
| LH2 forward      | GCGTCGTCTAGAAGCATCCCCACAGATAAATTATTTAGTCATAACTGTAG                |
| LH2 reverse      | GCGTCGGCGGCCGCTCAGGGATCTATAAATGACACTGCAATGTATCTTGTTC              |
| LH2L735D forward | GGAGCTTCATGCATCCTGGGAGAGACACATTTGCATGAAGGACTTCCTG                 |
| LH2L735D reverse | CAGGAAGTCCTTCATGCAAATGTGTGTCTCTCCAGGATGCATGAAGCTCC                |

**Supplementary Table 6** Data collection and structure refinement statistics

|                                          | L230_Iodine                      | L230_Native                      |
|------------------------------------------|----------------------------------|----------------------------------|
| <b>Data collection</b>                   |                                  |                                  |
| Beamline                                 | GM/CA-CAT 23-ID-D                | GM/CA-CAT 23-ID-B                |
| Wavelength (Å)                           | 1.77                             | 0.98                             |
| Space group                              | P4 <sub>3</sub> 2 <sub>1</sub> 2 | P4 <sub>3</sub> 2 <sub>1</sub> 2 |
| Cell dimensions                          |                                  |                                  |
| a, b, c (Å)                              | 109.21, 109.21, 83.91            | 109.46 109.46 84.02              |
| Number of reflections measured           | 577481                           | 169899                           |
| Number of unique reflections             | 24748                            | 34800                            |
| Resolution (Å)*                          | 28.41-2.24 (2.32-2.24)           | 48.95-2.00 (2.07-2.00)           |
| R <sub>merge</sub>                       | 0.117 (0.759)                    | 0.160 (1.03)                     |
| R <sub>pim</sub>                         | 0.0234 (0.311)                   | 0.0793 (0.516)                   |
| CC <sub>1/2</sub>                        | 0.999 (0.635)                    | 0.993 (0.507)                    |
| Mean I/sigma(I)                          | 23.95 (1.80)                     | 8.82 (1.44)                      |
| Completeness (%)                         | 97.65 (84.19)                    | 99.61 (99.56)                    |
| Redundancy                               | 23.3 (6.4)                       | 4.9 (4.9)                        |
| <b>Refinement</b>                        |                                  |                                  |
| Resolution (Å)                           | 28.49-2.24                       |                                  |
| Number of reflections used in refinement | 24380                            | 34795                            |
| Number of reflections used for R-free    | 1961                             | 1753                             |
| R <sub>work</sub> /R <sub>free</sub>     | 0.223/0.241                      | 0.183/0.216                      |
| Number of atoms                          |                                  |                                  |
| All                                      | 3315                             | 3718                             |
| Protein                                  | 3171                             | 3271                             |
| Ligand/ion                               | 102                              | 2                                |
| Water                                    | 42                               | 445                              |
| B-factors                                |                                  |                                  |
| Protein                                  | 34.64                            | 27.27                            |
| Ligand/ion                               | 77.83                            | 44.04                            |
| Water                                    | 40.6                             | 37.29                            |
| R.m.s. deviations                        |                                  |                                  |
| Bond lengths (Å)                         | 0.002                            | 0.002                            |
| Bond angles (°)                          | 0.5                              | 0.52                             |
| Ramachandran statistics                  |                                  |                                  |
| Favored regions (%)                      | 95.21                            | 93.93                            |
| Allowed regions (%)                      | 4.79                             | 6.07                             |
| Outliers (%)                             | 0                                | 0                                |

\* Highest resolution shell is shown in parentheses.
